# Supplementary material for: Real-World Safety and Effectiveness of Voretigene Neparvovec: Results up to 2 Years from the Prospective, Registry-Based PERCEIVE Study
Source: MDPI journal article supplement (doi:10.3390/biom14010122), 2024-01-17

**Supplementary materials:****Supplementary Figure S1: Patient disposition flow chart**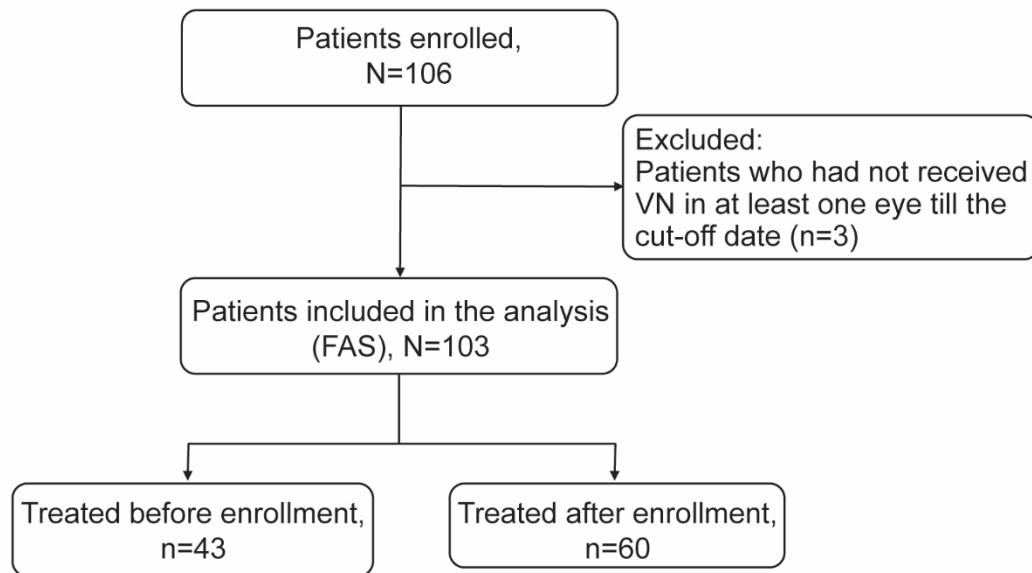

**Supplementary Figure S2: Change in visual field (Octopus kinetic perimetry [V4e])  
from baseline**

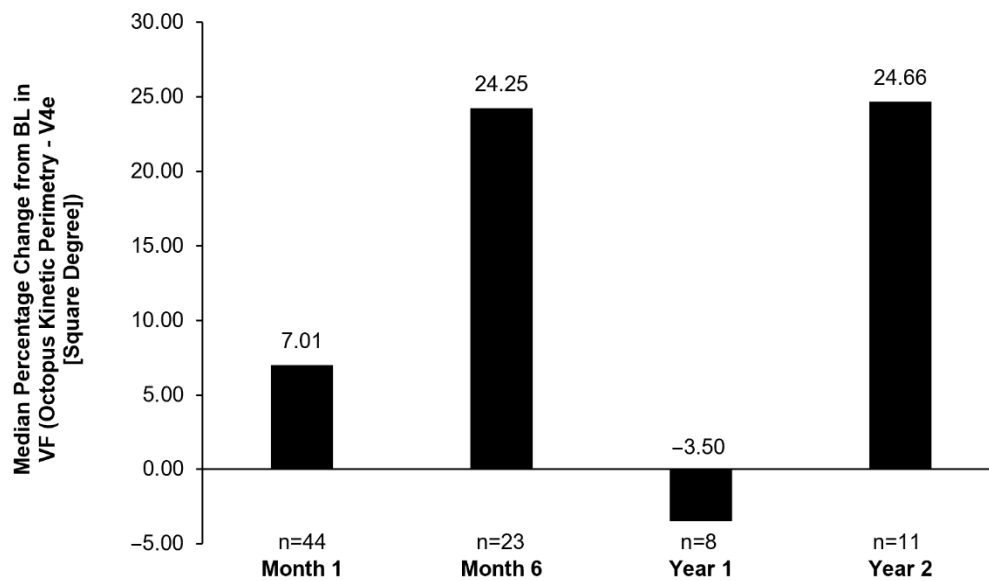

Supplement: s1 [file s1]
